# Supplementary material for: Regulatory T cells use heparanase to access IL-2 bound to extracellular matrix in inflamed tissue
Source: Springer Nature journal article supplement (doi:10.1038/s41467-024-45012-9), 2024-02-20
Supplement: 41467_2024_45012_MOESM3_ESM.pdf [file 41467_2024_45012_MOESM3_ESM.pdf]

## Description of Additional Supplementary Files

### **Supplementary Movie Legend:**

**Supplementary Movie 1.** HS and IL2 colocalize in inflamed CNS tissue. 3D rendering of a z2 stack of EAE spinal cord tissue (29 dpi) stained for IL-2 (green), HS (magenta), CD45 (yellow) 3 and DAPI (blue).
