# Supplementary material for: Regulatory T cells use heparanase to access IL-2 bound to extracellular matrix in inflamed tissue
Source: Nat Commun. 2024 Feb 20;15:1564. doi: 10.1038/s41467-024-45012-9 (PMC10879116; doi:10.1038/s41467-024-45012-9)
Supplement: Supplementary file 6 — Source Data [file 41467_2024_45012_MOESM6_ESM.xlsx]

## Sheet: Figure 1
Source Data
Figure 1c	IL-2 abundance	naïve			early acute EAE (d14)					late acute EAE (d29)				chronic EAE (d40)
	perilesion	21.4	33.1	25.2	34.1	20.1	32.4	16.2	34.1	20.6	23.6	32	19.3	24.2	24.5	54.7	37.7
	lesion	21.4	33.1	25.2	20.9	18.3	24.1	23.1		50.9	35.9	47.6	39.9	29.5	29.3	77.7	37.8
	pia	22.2	39.4	27	42.7	26.5	26.7	17.3		70.8	22.2	39.4	53.9	29.3	31.2	77.4	39.9
	HS abundance	naïve			early acute EAE (d14)					late acute EAE (d29)				chronic EAE (d40)
	perilesion	6.5	14.4	7.9	6.9	2.4	1.5	2.1	9.3	20.6	23.6	32	19.3	24.2	24.5	54.7	37.7
	lesion	6.5	14.4	7.9	31.7	4.8	3	8.5		50.9	35.9	47.6	39.9	29.5	29.3	77.7	37.8
	pia	7.8	20.7	29.8	29.9	5.1	5.5	0.8		70.8	22.2	39.4	53.9	29.3	31.2	77.4	39.9
	IL-2 colocalization	naïve			early acute EAE (d14)					late acute EAE (d29)				chronic EAE (d40)
	perilesion	20.6	35.7	22	15.7	7.1	2.8	9.5	22.6	92.9	42.9	44.9	63.9	87.3	67	55.9	58.6
	lesion	20.6	35.7	22	63.6	5.6	9.8	29.4		95.9	60.1	56.9	73	90.9	70.1	85	76.6
	pia	28.9	42.5	77.4	59.6	17.1	17.5	3.5		91.3	40.4	55.4	72.1	90.1	64.8	90.5	48.3
Figure 1e	IL-2 colocalization	buffer			heparinase
	perilesion	52.14	48.82	44.46	3.96	3.22	1.8
	lesion	67.65	64.01	59.37	22.47	10.17	11.12

## Sheet: Figure 2
Source Data
Figure 2a	IL-2 dose (IU/ml)	IL2		HS-IL2		HS
	0	-510	510	-510	510	-510	510
	1	-831.833	-261.833	1135.17	1462.17	755.167	16.1667
	3	1627.17	603.167	1713.17	1856.17	-275.833	326.167
	10	776.167	4130.17	3340.17	2375.17	-700.833	-427.833
	30	999.167	1696.17	8222.17	7777.17	2401.17	181.167
	100	3584.17	3228.17	10378.2	10750.2	409.167	358.167
	300	4377.17	7316.17	11561.2	11958.2	1039.17	1980.17
Figure 2c	[IL2], IU/ml	bead-IL2			bead-T51P
	0	0	0	13.2921	1.70541	2.26847	1.88412
	10	0	0	3.42003	14.4693	0.216723	0
	100	0	23.0515	16.8015	3.21955	3.41448	13.2964
	1000	44.8316	45.9004	50.2897	25.1425	32.3962	23.7437
	10000	103.638	68.7601	71.9757	33.1217	47.6736	56.5147
	100000	656.314	259.048	155.825	54.5921	65.8264	69.4202
Figure 2d	Treg frequency	20 IU/ml IL2				Live of Foxp3+	20 IU/ml IL2
	-	6.32	8.55	8		-	19.8	20.2	19.6
	IL2	5.94	9.93	10.2		IL2	18.4	29.4	32.7
	HS-IL2	12.5	16.9	14.8		HS-IL2	38.1	50	46.2
Figure 2e	Live of Foxp3-	20 IU/ml IL2
	-	30.4	22.5	24.9
	IL2	31.6	34.7	39.8
	HS-IL2	41.3	47.8	41.2
Figure 2f		bead-IL2			bead- T51P
	1*10^2	2.8	3.3	4.3	1.4	2.9	0.5
	1*10^3	2.8	4.9	5.8	1.9	0.8	5.7
	1*10^4	10.5	6.5	7.8	3.6	4.6	3.1
Figure 2g		bead-IL2			bead- T51P
	1*10^2	5.6	9.7	5	7.4	10	9.3
	1*10^3	9	12.8	5.7	16.6	9.6	2.8
	1*10^4	14.5	11.8	12.7	14.8	12.8	11.1
Figure 2i		beads												WT Treg strip
	control beads	0	0	0	19.1953	0.801978	8.85067	229.049	4.38778	0	554.569	250.43	132.717	0	0	0	46.1499	20.4725	4.92583	0	0	114.08	203.133	186.732	427.658
	IL2-loaded beads	101.339	273.728	189.345				662.799	1661.52	0				3.18578	97.246	63.9497				49.5322	0	0
	T51P-loaded beads				65.2328	53.5275	42.4363				196.592	211.317	162.746				23.9325	23.2879	148.01				308.467	354.273	291.419

## Sheet: Figure 3
Source Data
Figure 3a		Treg				Tconv						Figure 3b	Replicate 1										Replicate 2
	0	8.55982	3.97002	8.40179	4	6.2898	2.2167	4.21613	2
	24hr	9.62196	15.493	34.6124	15.5	4.542	9.68214	7.53975	9.5
Figure 3c
		Treg		Tconv
	0	0.454	10.1603	0.6866	1.9792
	24hr	5.0227	36.7199	3.8622	6.087
	48hr	3.0455	4.2062	0.6632	0.2654
Figure 3d	CD4+/CD25+/CD127- Treg	CD4+/CD25-/CD127+ Tconv
	1.57049	0.994222
	1.59579	0.871329
	1.59579	1.13445
Figure 3f	Treg	Tconv
	5.2854	3
	4.45943	2.58496
		3.90689
		3.32193
		2.58496
	5.2854	3.90689
	5.52356	3.16993
	5.61471	3
	4	3.45943
	5.04439	3.45943
	5.39232	2.80735
	4	2.80735
	3.32193	2.80735
	4.08746	2.32193
	5.58496	3.90689
	5.72792	3
	6.02237	4.58496
	4.9542	2.32193
	4	4.75489
	3.90689	3.58496
	3.58496	2.80735
		2

## Sheet: Figure 4
Source Data
															Figure 4a	Replicate 1								Replicate 2
Figure 4b	[IL2], IU/ml	WT - hIL2			WT - T51P			HPSE+ - hIL2			HPSE+ - T51P
	0	0	0	12.3501	1.36704	2.10234	1.67236	1.26129	1.38669	0.942998	0	0	0
	10	0	0	3.66994	14.7734	0.216723	0	3.31691	0	0	0	0	0
	100	0	20.9287	16.8346	3.14505	3.63886	14.1241	6.15695	3.15825	5.72028	3.72625	3.24742	2.95679
	1000	43.0247	43.1124	51.4121	25.7592	33.3871	26.3243	33.531	64.3758	26.2271	11.6447	10.9089	13.3438
	10000	103.621	65.7058	71.53	33.7332	49.029	58.5983	137.174	497.59	103.349	44.9184	18.9896	96.0913
	100000	662.345	213.728	151.166	55.1848	68.4683	75.0571	983.596	878.999	433.286	37.0096	29.4009	180.942
Figure 4c	Treg	WT			HPSE-/-
	1*10^2	2.8	3.3	4.3	1.93333	-0.0666667	1.33333
	1*10^3	2.8	4.9	5.8	0.0333333	0.733333	1.33333
	1*10^4	10.5	6.5	7.8	6.33333	2.93333	6.43333
Figure 4d	Tconv	WT			HPSE-/-
	1*10^2	5.6	9.7	5	11.4333	12.8333	12.4333
	1*10^3	9	12.8	5.7	11.6333	5.63333	12.9333
	1*10^4	14.5	11.8	12.7	18.6333	8.03333	10.1333
Figure 4e	Time (min)	WT			HPSE-/-
	0	0.877947	1.01734	1.10472	0.891667	1.37222	0.736111
	5	4.53537	3.45354	3.30791	2.01389	2.36111	2.52778
	30	6.17892	5.90846	4.681	2.84722	3.30556	3.33333
	120	4.45215	2.8294	2.60055	1.83333	1.80556	1.59722
Figure 4f	WT	HPSE-/-
	12	9.39
	9.55	7.5
	9.72	6.56
	11.9	7.58
	10.1	9.79
	9.64	11.7
	11.6
	12.1
Figure 4h		WT						HPSE-/-
	spleen	10.9	13.1	11.4	10.9	11.2	10	7.8	9.89	8.64	5.86	8.51	7.5
	LN	12.7	14	10.3	9.92	11.4	10.1	9.12	10.1	8.59	8.07	6.69	7.5
	thymus	2.55	2.75	2.8				1.85	2.24	1.65
	BM	24.6	22.4	31.6				21.7	26.7	21.7
		WT				HPSE-/-
	lungs	5.75	5.75	7.65	5.16	4.18	5.02	3.42	6.75
	LI	6.9	9.2	6.16		9.57	3.43
	Blood	2.97	2.31	2.36		3.95	3.41	2.64	3.54
Figure 4i	Spleen	WT									HPSE-/-										LN	WT									HPSE-/-
	4										7.92	6.66	8.31								4										7.5	6.54	7.8
	5.2	6																			6	9.42	11.63	11.3	11.4
	6	14.5	11.69	13.47	11.6	9.8															7										6.89	8.71	7.85	7.52	8.93	6.58	7.32	5.25	6.03
	7.1										7.07	6.28	7.05	6.76	6.96	7.24	6.48	6.17	5.46		9	10.5	11.1	9.7	11.7	13
	9	15	13.5	16	13.3	10.8	20.1	14.6													10										9.13	8.77	10.23	11.08	9.7	9.4	8.72	8.07	8.15
	10										8.94	7.43	7.37	9.1	6.98	8.16	7.37	8.21	7.54		15	14.7									13	6.6	14	15	14	14
	15	14.7									9.3	5.7	11	13	13	12					19.55										11.97
	19.7	12.1																			19.7	11.8
	20.1										10.4										20.1										10.5
	21										6	4									20.28	15.83
	24	16																			20.4										11.25
	24.8										6.91	7.91									21										9	7
	27.3		17	13.7																	21.15
	27.8										12.2	17.2	13								24	18
	28										8.17										24.8										10.3	9.81
	29.3	12.4																			28										11.8
	30.6	11.6																			29.3	12.4
	31										7.3	13	3.9	4.5							30.6	14.1
	32.9	15.6	16.6																		31										11	12	11	8.8
	34.3										11.2										32.9	12.5	11.7
	36.5	12.6	12.7																		34.3										13.8
	37.4	18.1																			36.5	18.3	15.2
	38.4	13																			37.4	13.5
	40.3	17.7																			38.4	13
	41.6										18.2	9.22	12.7								40.3	11.9
	44.8										19.3										41.6										9.35	7.03	10.9
	47.1										16.4										44.8										10.5
	48.5										11.3										46.1
	49	29	26																		47.1										9.8
	51	27										19.7									48.5										10.3
	52	19																			49	20	22
	54.5											9.33									51	27										13.5
	57	26																			52	13
	58	29	25.4																		54.5										12.7
	59	29.8
	60.4																				57	20
	64	30																			58	18	29.8	17.6
	43.6	16.3																			60.4
	55.3										16.9	10.8									64	21
	62.3										14.7	18.2									43.6	16.6
	25.3	13.7	14.1	12.2																	55.3										12.8	13.2
	24.5										7.06	8.8	9.12								62.3										16.8	15.2
	59	18.6																			27.3		14.1	15.5
	65.6										16.6		16.6								27.8										15	13.6	14.7
	31.4	15.5																			25.3	12.6	11.9	12.1
	32.2										11.5										24.5										7.69	9.62	8.82
	31.9	13.8																			59	20.9
	32.7										11.3										65.6										14.3		16.7
	28.8	10.4									7.76
Figure 4l		CD45.1+ WT			CD45.2+ HPSE-/-
	spleen	4.25	3.6	3.7	3.48	3.25	3.16
	LN	2.1	2	2.34	1.3	1.65	1.33
	thymus	0.73	0.47		0.64	0.53
Figure 4o		CD45.1+ WT					CD45.2+ HPSE-/-
	spleen	61.9	60	54.6	60.3	66	36.5	36.7	43.8	39.7	32
	LN	62.1	54.5	60.6	64.1	65.2	37.9	45.5	36.6	35.9	33.7

## Sheet: Figure 5
Source Data
Figure 5b		WT			HPSE-/-
	Astro	1.27898	2.2527	0.653014	-0.503316	-2.91455	1.06516
	Astro + IL2	14.8879	17.5541	16.279	10.0897	10.5579	9.97269
Figure 5c		WT			HPSE-/-
	Astro	-2.07083	0.344828	-0.717614	0.156556	-0.342466	-2.07436
	Astro + IL2	2.69338	6.6356	5.40541	0.684932	3.23875	3.62035
Figure 5d		WT - hIL2						HPSE-/- - hIL2
	-	-2.06667	5.63333	6.03333	4.13333	-2.46667	11.3333	4.3	0.6	5	2.4	5.9	5.7
	1*10^2	5.43333	8.03333	13.8333	0.333333	11.8333	16.9333	-3.5	-2.1	-4.5	0.7	2.7	3.4
	1*10^3	0.633333	0.133333	13.7333	9.93333	10.1333	10.8333	-8.06	-3.7	-4.4	-1.8	-5.4	1.1
	1*10^4	0.433333	12.8333	21.6333	11.6333	10.4333	16.9333	-0.7	-3.7	-4.5	-6.64	-2.5	-2.2
Figure 5e		WT - hIL2						HPSE-/- - hIL2
	-	2.36667	-1.13333	8.86667	1.96667	-2.34333	9.66667	0.333333	2.90333	1.97333	2.42333	2.40333	3.26333
	1*10^2	2.16667	-1.94333	13.4667	0.0666667	-2.77333	9.06667	1.69333	2.78333	3.96333	1.99333	2.95333	2.22333
	1*10^3	2.86667	-2.31333	8.26667	1.66667	-3.02333	5.56667	2.05333	2.59333	1.43333	1.23333	2.75333	3.00333
	1*10^4	1.66667	-1.23333	10.7667	1.56667	-1.13333	7.66667	1.88333	3.09333	2.71333	2.46333	2.47333	2.71333
Figure 5f	Treg:Teff	wt:wt			ko:wt
	Teff	96.7727	110.604	92.6233	94.7931	83.2831	121.924
	1:16	119.594	102.997	86.3993	140.833	135.078	111.236
	1:8	99.539	67.0355	77.4089	93.1488	138.367	130.145
	1:2	85.7077	32.4574	52.5127	120.28	113.702	55.3302
	1:1	46.2886	53.8958	8.8059	47.1088	47.9309	3.28857
	2:1	5.83218	11.9179	-17.7501	10.1124	3.453	-13.5654
Figure 5h	Day	control														WT Treg								HPSE-/- Treg
	-2	0	0	0	0	0	0	0	0	0	0	0	0	0	0	0	0	0	0	0	0	0	0	0	0	0	0	0	0	0
	-1	0	0	0	0	0	0	0	0	0	0	0	0	0	0	0	0	0	0	0	0	0	0	0	0	0	0	0	0	0
	0	0	0	0	0	0	0	0	0	0	0	0	0	0	0	0	0	0	0	0	0	0	0	0	0	0	0	0	0	0
	1	0	0	0	0	0	0	0	0	0	0	0	0	0	0	0	0	0	0	0	0	0	0	0	0	0	0	0	0	0
	2	0	0	0	0	0	0	0	0	0	0	0	0	0	0	0	0	0	0	0	0	0	0	0	0	0	0	0	0	0
	3	0	0	0	0	0	0	0	0	0	0	0	0	0	0	0	0	0	0	0	0	0	0	0	0	0	0	0	0	0
	4	0	0	0	0	0	0	0	0	0	0	0	0	0	0	0	0	0	0	0	0	0	0	0	0	0	0	0	0	0
	5	0	0	0	0	0	0	0	0	0	0	0	0	0	0	0	0	0	0	0	0	0	0	0	0	0	0	0	0	0
	6	0	0	0	0	0	0	0	0	0	0	0	0	0	0	0	0	0	0	0	0	0	0	0	0	0	0	0	0	0
	7	0	0	0	0	0	0	0	0	0	0	0	0	0	0	0	0	0	0	0	0	0	0	0	0	0	0	0	0	0
	8	0	0	0	0	0	0	0	0	0	0	0	0	0	0	0	0	0	0	0	0	0	0	0	0	0	0	0	0	0
	9	0	0	0	0	0	0	0	0	0	0	0	0	0	0	0	0	0	0	0	0	0	0	0	0	0	0	0	0	0
	10	0.5	0	0.5	1	1	0	0.5	0	0.5	0	0	0.5	0.5	0.5	0.5	0.5	0	0.5	0	0	0	0	0.5	0	0	0	0	0	0.5
	11	0	0.5	1.5	2	2.5	0	0	0	0.5	0	0	0.5	0.5	1.5	0	0	0.5	0.5	0	0.5	0	0	0	0	0.5	0.5	0	1	1
	12	0.5	1	2	2.5	3	0.5	0	0	1	1	0.5	0.5	1	2.5	0.5	0.5	1.5	1.5	1	0	0.5	0.5	0.5	1	0.5	1	0.5	1.5	2
	13	0.5	1.5	2	3	3	1	0	0	1.5	1.5	0.5	0.5	1	3	0.5	1	2	2	1.5	0	0.5	1	0.5	1.5	0.5	1	0.5	2	3
	14	1	3	2.5	3	3	1.5	0.5	0.5	3.5	1.5	2	0.5	2.5	3.5	0.5	1	3	3	2	0.5	1	1.5	0.5	3	0.5	1	0.5	2.5	3.5
	15	2	3	3	3	3.5	2	1.5	0.5	3.5	3	2	1	3	3.5	0.5	1	3	3	2.5	0.5	2	2	1	3.5	0.5	1	1	3.5	4
	16	2	3	3.5	3	3.5	2.5	2.5	0.5	4	3.5	1	1.5	3.5	3.5	1	2.5	3	3	3	1.5	1.5	2	1.5	3.5	1	1.5	2	3.5	4
	17	2.5	3	3.5	3	3.5	2	3	2.5	4	3.5	1	2.5	3.5	3.5	1.5	2.5	3	3	3	2.5	1.5	2	2	3.5	2	2	3	4	4
	18	2.5	2.5	3.5	2.5	3.5	2.5	3	4	4	3	1	3	4	4	1	2	2.5	3	1.5	3	1.5	2	2	3	3	2.5	3.5	3	4
	19	1	3	3	2.5	3.5	2	2.5	3.5	4	2.5	1.5	2.5	3.5	4	1.5	2	2.5	2.5	2	3	1	2.5	2	3	3	2	3	3.5	4
	20	1.5	3	3	2.5	3.5	2	2.5	3	4	2.5	1.5	2	3	4	1.5	2	2.5	2.5	2.5	3	1	2.5	2	3	3	2	3	3.5	4
	21	1.5	3	3	3.5	3.5	1.5	2.5	3	4	2.5	1.5	2	3	4	1.5	1.5	2.5	2.5	3	2.5	1.5	1.5	2	3	3	2	3	3.5	3.5
	22	1.5	3	3.5	3	3.5	1.5	2.5	3	3.5	2.5	1.5	1.5	3	4	1	1	2	2.5	2.5	2	1	1.5	1.5	3	3	1.5	2	4	3.5
	23	1.5	3	3	3	3.5	1.5	2.5	2.5	4	2.5	1.5	1.5	3	4	1	1.5	2	1.5	1	2	2.5	1.5	1	3	3	2	2.5	3.5	3
	24	1.5	3.5	3	2.5	3.5	1.5	3	2	4	2.5	1.5	1.5	3	4	1	1	2	2	2.5	2	0.5	1.5	1.5	4	2	2	2.5	3.5	3.5
	25	1.5	3.5	3	2.5	3.5	1.5	3	2	4	2.5	1.5	1.5	3	3.5	1	1	2.5	2	2.5	2	0.5	1.5	1.5	4	2	2	2.5	3.5	4
	26	2	3	3	2.5	3.5	1.5	2.5	2	3.5	2.5	1.5	2	3	3.5	1	1.5	2.5	2	2.5	2	0.5	1.5	2	4	2	2	2	4	4.5
	27	2	3	3	2.5	3.5	1.5	2.5	2	3.5	2.5	1.5	2	3	3	1	1.5	3	2	2.5	2	0.5	1.5	2	4	2	2	2	4	5
	28	1.5	3	2.5	2.5	3.5	1.5	3	2.5	4	2.5	1.5	2	3	4	1	1	2.5	2.5	3	1.5	0.5	1	2	4	2	2	2	4	5
	29	2	3	2.5	3	3.5	1.5	3.5	3.5	4	2.5	1.5	1.5	3	4	0.5	1.5	2.5	1.5	1.5	1.5	0.5	1	2.5	4	2	2	2	4	5
	30	1.5	3.5	3	3.5	3.5	3.5	3.5	3.5	3.5	4	1.5	2	2	3.5	0.5	1.5	2.5	1.5	1.5	1.5	0.5	1	2.5	4	2	2	2	4	5
Figure 5i	Fold Foxp3+ frequency	control mAbCAR			HPSE mAbCAR
		1	0.987705	1.20492	1.40574	1.26229	1.33197
Figure 5j	MFI	control mAbCAR			mAbCAR-HPSE
	Foxp3 (GFP)	600	575	580	750	780	782
	CD25	3000	3500	3550	6100	6250	6150
	CD44	510	501	500	500	505	498
	CTLA-4	210	220	212	275	310	276
	PD-1	480	470	486	530	560	565
Figure 5k	MFI	control mAbCAR		mAbCAR-HPSE
	Foxp3 (GFP)	345	351	377	380
	CD44	819	823	772	789
	CTLA-4	157	146	219	230
	PD-1	149	140	175	183
Figure 5l	Day	control							MOG-mAbCAR-Treg					MOG-mAbCAR-TregHPSE
	5	0	0	0	0	0	0	0	0	0	0	0	0	0	0	0	0	0	0
	6	0	0	0	0	0	0	0	0	0	0	0	0	0	0	0	0	0	0
	7	0	0	0	0	0	0	0	0	0	0	0	0	0	0	0	0	0	0
	14	2	2	2	2	2	2.5	2	2	2	2	2	2	2	2	2	2	2	2
	15	2.5	3	2.5	3	2.5	2	2	1.5	3.5	3	1	1	0.5	3	3	1	1.5	2.5
	16	3	3.5	3	3.5	3	2.5	2	2	3	3	2	2	0.5	3	3.5	1	1	2
	18	3	3.5	4	3.5	3	2.5	2	2.5	3	3	2.5	2.5	0.5	3	3	1.5	1	2
	19	3	4	4	3.5	3.5	3	2	3	3	3	2.5	2.5	0.5	3	3	1.5	1.5	1.5
	20	3.5	4	4	3.5	3.5	4	2	2.5	2.5	3	2.5	2.5	0.5	2.5	3.5	1.5	2	1.5

## Sheet: Suppl Fig 4
Source Data
SFig 4a	[IL2], IU/ml	IL2		T51P
	1e-13	954.688	-954.688	954.688	-954.688
	1e-12	1107.81	4170.81	-516.188	1294.81
	3e-12	6134.81	8729.81	5247.81	3965.81
	1e-11	12230.8	14757.8	5766.81	5364.81
	3e-11	19705.8	22342.8	12286.8	13014.8
	1e-10	26631.8	30994.8	21584.8	22554.8
	3e-10	30114.8	33757.8	31484.8	29688.8
	1e-09	31456.8	35422.8	34638.8	29415.8
SFig 4b	[IL2], IU/ml	WT - hIL2				WT - T51P
	0	40.9348	39.217			10.7677	8.236
	1	40.9349	39.221	22.8624	46.6718	11.091	8.578
	3	40.9373	39.249	22.8891	46.6774	12.1324	9.439
	10	40.9806	39.569	23.8717	46.7913	17.3789	13.009
	30	41.5792	42.318	76.6893	50.1021	38.6302	24.945
	100	52.6011	72.85	1610.05	117.779	144.701	72.982
	300	204.82	335.14	6559.39	1089.14	558.012	218.537
	1000	2999.93	3224.59	6958.65	2010.22	2293.9	639.86
SFig 4c	[IL2], IU/ml	WT - hIL2			WT - T51P
	0	20.3622	20.7814	5.40275	2.56916	0.972594
	10	20.9047	20.8401	5.56172	4.78083	1.18764
	100	23.0469	22.017	7.86076	10.2539	3.10645
	1000	33.6398	46.1804	41.8565	24.7824	20.9873
	10000	85.8465	370.657	342.465	46.9672	125.284
	100000	338.945	908.402	725.241	62.8895	260.899

## Sheet: Suppl Fig 6
Source Data
SFig 6a		IL2			T51P
	con	18.4	15.1	17.8	18.4	15.1	17.8
	1*102	19.9	20.4	21.4	18.5	20	17.6
	1*103	19.9	22	22.9	19	17.9	22.8
	1*104	27.6	23.6	24.9	20.7	21.7	20.2
SFig 6b		CD25+			CD25-
	control	45	45.3	42.8	3.54	2.2	2.86
	1*102	38.6	40.8	40.9	3.91	5.02	3.16
	1*103	41.7	40.1	42.1	2.65	2.75	2.27
	1*104	46.4	44.4	44.4	3.04	2.69	2.68
SFig 6c		IL2			T51P
	con	35.3	32.5	33.2	35.3	32.5	33.2
	1*102	36	35.5	36.4	38	32.6	37.1
	1*103	38.3	39.9	38.2	42.4	39.4	34.9
	1*104	37.1	35.7	38.2	36.9	40.3	38.4

## Sheet: Suppl Fig 8
Source Data
SFig 8a		Treg	Treg + IL2	Tcon	Tcon + IL2
	0	8.40179		4.21613
	24hr	34.6124	11.9172	7.53975	7.67288
	72hr	19.215	5.99479	2.76748	2.95617
SFig 8e	Crohn's Disease			Ulcerative Colitis			Healthy Control
	Treg	Tconv		Treg	Tconv		Treg	Tconv
	5.2854	3.90689		3.32193	2.80735		5.2854	3
	5.52356	3.16993		4.08746	2.32193		4.45943	2.58496
	5.61471	3		5.58496	3.90689			3.90689
	4	3.45943		5.72792	3			3.32193
	5.04439	3.45943		6.02237	4.58496			2.58496
	5.39232	2.80735		4.9542	2.32193
	4	2.80735		4	4.75489
				3.90689	3.58496
				3.58496	2.80735
					2

## Sheet: Suppl Fig 10
Source Data
SFig 10a		WT			HPSE-/-
	1*102	2.33333	1.83333	2.73333	0.933333	3.23333	5.43333
	1*103	4.63333	6.23333	4.53333	-0.966667	0.433333	-0.366667
	1*104	3.43333	2.03333	4.53333	5.23333	5.33333	4.03333
SFig 10c	Time (min)	WT (sIL2)			KO (sIL2)
	0	42.2	48.9	53.1	64.2	98.8	53
	5	228	331	225	233	306	455
	30	241	262	214	249	332	462
	120	335	289	157	163	158	154
SFig 10e	Spleen			LN
	WT	HPSE-/-		WT	HPSE-/-
	14.7	9.3		14.7	13
	12.1	5.7			6.6
		11		11.8	14
		13			15
	16	13		15.83	14
		12			14
		10.4			11.97
		6		13.75
	12.4	6.91		18	10.5
	11.6
		12.2			11.25
	15.6	8.17		12.4	9
				14.1
	12.6
	17	7.3		12.5	10.3
	13.7				11.8
	16.6	11.2		18.3
		4		11.7
	12.7				11
	13.7	7.91		15.2
	14.1			14.1	13.8
	12.2	17.2		15.5	7
		13		12.6
		13		11.9
		3.9		12.1	9.81
		4.5			12
		7.06			11
		8.8			8.8
		9.12			15
					13.6
					14.7
					7.69
					9.62
					8.82
SFig 10f	10BiT Spleen			10BiT LN			C57Bl/6 Spleen			C57Bl/6 LN
	WT	HPSE-/-		WT	HPSE-/-		WT	HPSE-/-		WT	HPSE-/-
	12.1	10.4		11.8	10.5		14.7	9.3		14.7	13
	11.6	6.91		14.1	10.3		16	5.7		18	6.6
	17	7.06		15.5	7.69		12.4	11		12.4	14
	13.7	8.8		12.6	9.62			13			15
	13.7	9.12		11.9	8.82			13			14
	14.1			12.1				12			14
	12.2							6			9
								7.3			11
								4			7
								7.91			9.81
								13			12
								3.9			11
								4.5			8.8
SFig 10g		WT			HPSE-/-
	IFNγ+	3.76	3.08	2.93	2.64	3.39	1.5
	IL-17+	0.75	0.45	0.51	0.35	0.26	0.28
	TNFα+	8.53	6.33	5.95	6.87	8.74	5.18
SFig 10h		CD45.1+ WT					CD45.2+ HPSE-/-
	spleen	90.2	94	93.2	94.1	89	91.4	90	95.6	91.8	97.4
	LN	80.8	88.5	89.8	93.5	80.3	88.2	78.3	88	91.2	91.6

## Sheet: Suppl Fig 11
Source Data
SFig 11a		Treg
	input	86	84.8	88
	-	9.14	8.03	9.1
	sIL2	21.8	22.1	22
	Astro	9.86	10.7	9.32
	Astro + IL2	21.6	23.9	22.8
	Astro + IL2 + Hpse	20.2	18	20.6
SFig 11b		Tconv
	input	97	96.9	96.7
	-	25.6	23.8	25.7
	sIL2	24.8	24.5	24.4
	Astro	49.3	49.6	46.9
	Astro + IL2	48.4	46.9	48.1
	Astro + IL2 + Hpse	42.9	43.9	41.2
SFig 11c		WT			HPSE-/-
	Astro	27.9243	26.8087	23.3604	19.812	19.409	20.9201
	Astro + IL2	25.5916	23.4618	24.9831	19.812	20.4164	19.2075
SFig 11d		WT - hIL2						HPSE-/- - hIL2
	-	5.9	1.2	5.3	3.1	3.4	4	3.23333	2.33333	4.23333	5.13333	5.33333	4.83333
	1*10^2	4.8	1.2	6.1	6	2	5.8	0.733333	3.23333	4.93333	6.93333	4.53333	4.33333
	1*10^3	4.1	2.1	4.6	5.6	1.9	4.5	2.43333	2.03333	4.43333	5.23333	4.63333	4.23333
	1*10^4	5	1	6.7	6.4	2.3	4.3	1.33333	4.83333	4.33333	5.63333	4.43333	4.63333
SFig 11e		WT - IL2			WT - T51P
	1*10^2	-648.831	-648.831	-648.831	-502.427	-502.427	-502.427
	1*10^3			-514.309			-300.592
	1*10^4		-625.843	472.875	266.38	84.9921	-152.125
SFig 11f		HPSE+ - IL2			HPSE+ - T51P
	1*10^2	-376.517	44.6715	2656.73	501.637		3.53492
	1*10^3	2701.89			-730.122	-362.811	-655.246
	1*10^4		3483.89		-320.392	-399.125	226.235

[truncated: 1 more sheets: Suppl Fig 12]
